# Toll Like Receptor 9 (*TLR9*) Polymorphism G520R in Sheep Is Associated with Seropositivity for *Small Ruminant Lentivirus*

Theologia Sarafidou<sup>1</sup>, Costas Stamatis<sup>1</sup>, Georgia Kalozoumi<sup>1</sup>, Vassiliki Spyrou<sup>2</sup>, George C. Fthenakis<sup>3</sup>, Charalambos Billinis<sup>3</sup>, Zissis Mamuris<sup>1\*</sup>

**1** Department of Biochemistry and Biotechnology, University of Thessaly, Larissa, Greece, **2** Department of Animal Production, Technological Educational Institute, Larissa, Greece, **3** Faculty of Veterinary Medicine, University of Thessaly, Karditsa, Greece

## Abstract

Infectious diseases of sheep are of major economic importance causing direct and indirect losses. Among the major sheep infectious agents are *Small Ruminant Lentivirus*, *Chlamydomphila abortus* and *Mycobacterium avium* subsp. *paratuberculosis* infections, mainly due to their worldwide distribution and economic impact that they cause. Based on the differential susceptibility to infectious diseases between and within breeds and on the recent findings regarding the putative involvement of TLR9 in disease susceptibility, the aim of this study was to evaluate the levels of nucleotide variation of TLR9 and its mediator MyD88 in three sheep flocks originated from different breeds and assess their possible association with seropositivity/seronegativity for different infectious agents. The analysis indicated that the change of G to R at codon 520 of TLR9 polypeptide shows a significant association with *Small Ruminant Lentivirus* seropositivity. This amino-acid substitution, which can result in polarity change, might influence structure and function of LRR17, interfering with ligand binding and thus could be used in studies investigating susceptibility/resistance to *Small Ruminant Lentivirus* infections in sheep.

**Citation:** Sarafidou T, Stamatis C, Kalozoumi G, Spyrou V, Fthenakis GC, et al. (2013) Toll Like Receptor 9 (*TLR9*) Polymorphism G520R in Sheep Is Associated with Seropositivity for *Small Ruminant Lentivirus*. PLoS ONE 8(5): e63901. doi:10.1371/journal.pone.0063901

**Editor:** Xiaofeng Ren, Northeast Agricultural University, China

**Received:** November 26, 2012; **Accepted:** April 8, 2013; **Published:** May 15, 2013

**Copyright:** © 2013 Sarafidou et al. This is an open-access article distributed under the terms of the Creative Commons Attribution License, which permits unrestricted use, distribution, and reproduction in any medium, provided the original author and source are credited.

**Funding:** This work was supported by the postgraduate programs "Biotechnology-Quality Assessment in Nutrition and the Environment" and "Molecular Biology and Genetics Applications - Diagnostic Markers" of the Department of Biochemistry and Biotechnology (<http://www.bio.uth.gr/>), University of Thessaly, Greece. The funders had no role in study design, data collection and analysis, decision to publish, or preparation of the manuscript.

**Competing Interests:** The authors have declared that no competing interests exist.

\* E-mail: [zmamur@bio.uth.gr](mailto:zmamur@bio.uth.gr)

## Introduction

Infectious diseases adversely affect health and production of sheep, with their control measures including administration of antimicrobial drugs, which may lead in development of antibiotic-resistant bacterial strains, vaccination of animals, which must be performed strategically in order to be effective, and management measures, which rely on the farmer's compliance [1]. Nevertheless, there is evidence of genetic variation between sheep breeds and individuals in their susceptibility to infections. This can offer an opportunity for genetic selection for resistance to infectious diseases, through identification of responsible genes and study of host-resistance mechanisms.

Among the important infective agents of sheep are *Small Ruminant Lentivirus*, *Chlamydomphila abortus* and *Mycobacterium avium* subsp. *paratuberculosis*, all with a worldwide distribution. *Small Ruminant Lentivirus* infections, responsible for significant economic losses, due to decreased milk production and early culling age of the animals [2], are caused by five groups of the virus (A, B, C, D, E), which affect a variety of tissues. *C. abortus* is an abortifacient agent, with zoonotic importance, responsible for significant financial consequences [3]. Ovine paratuberculosis, caused by *M. avium* subsp. *paratuberculosis*, results in increased mortality, morbidity and production losses in flocks and has a difficult

diagnosis, as infected animals may not develop clinical signs of the disease for several years [4].

Cumulative evidence indicates that Toll-Like Receptors (TLRs), which are key components of pathogen recognition and innate immunity mechanism activation, have been associated with increased susceptibility to various infective agents in humans (e.g., AIDS [5], lepromatous leprosy [6]) or animals (e.g., paratuberculosis in cattle [7], [8], salmonellosis in pigs [9], brucellosis in sheep [10]). TLRs are type I integral membrane glycoproteins (90–115 kD), consisting of an ectodomain with 19–25 tandem copies of a leucine rich repeat (LRR) motif and a cytoplasmic Toll/IL1R (TIR) domain, linked by a transmembrane domain [11]. These receptors bind lipids, lipoproteins, proteins and nucleic acids through their ectodomains, whilst adaptor-protein recruitment takes place via their TIR domain in order to promote signal transduction [11].

Association of TLR molecules with disease susceptibility in sheep has been suggested, based on their differential expression patterns between infected and non-infected animals and the results of association analysis of specific polymorphic sites with disease status; So far, SNPs in TLR1, TLR2, TLR4, TLR6 and TLR10 have produced suggestive associations with differential susceptibility to *Mycobacterium* infection [8,12,13,14]. The role of TLR signaling in mycobacterial infection has been described in increased susceptibility of TLR2 and MyD88 knockout mice

[15,16,17]. Recent studies have also indicated that specific *TLR* genes were differentially expressed in sheep infected or not with *M. avium* subsp. *paratuberculosis*, with *TLR9* showing the highest difference [18,19,20,21]. On the other hand and to the best of our knowledge, no polymorphisms in *TLR* genes potentially associated with *Small Ruminant Lentivirus* or *C. abortus* infection have been reported.

*TLR9* is expressed in the endosomal compartments of dendritic cells and macrophages. The functional receptor is present as a preformed dimer, recognizes unmethylated CpG dinucleotides in bacterial and viral DNA through the ectodomain and undergoes proteolytic cleavage of its N-terminal in order to be activated. As suggested, cleavage takes place in the spacer region between *LRR14* and *LRR15* of the ectodomain, a site, which conforms a flexible loop, possibly exposed to proteolysis [22,23]. Proteolysis of the *TLR9* is necessary for subsequent signal transduction through the adaptor protein *MyD88* [22,23], in order to activate the *NF-κB* pathway.

The study described here was designed and performed based on previous findings regarding involvement of *TLR9* in susceptibility of sheep to infections. Objectives of the study were to evaluate levels of nucleotide variation of *TLR9* and its mediator *MyD88* gene in three sheep flocks, derived from different breeds and to assess their potential association with seropositivity for *Small Ruminant Lentivirus*, *C. abortus* or *M. avium* subsp. *paratuberculosis*.

**Materials and Methods**

**Animals**

Samples from 115 sheep (*Ovis aries*) of the following three breeds: Boutsko-breed (n = 56), Friesarta-breed (n = 27) and Comisana-breed (n = 32 samples), were used in the study. Boutsko-breed is indigenous in Greece and includes animals with low production, usually farmed extensively in the mountains and arid areas of the country. Friesarta-breed is a cross breed, with high-yielding animals, farmed intensively in the lowlands. Comisana-breed is indigenous in Italy and includes animals with medium to high production, farmed in a variety of production systems. Samples were collected from three flocks, each one with animals of only one of the above breeds. All animals from which samples were collected, were older than 3 years.

All farms from animals of which samples were collected, were commercial flocks, managed semi-intensively; the flocks were under veterinary care, which was provided by private practicing veterinarians. No animals were euthanised during the study and

efforts taken to ameliorate animal suffering. The study did not involve any experimentation, but was based in blood samples, that had been collected from the sheep for routine diagnostic purposes in the participating flocks. Diagnostic veterinary procedures are not within the context of relevant EU legislation for animal experimentations (Directive 86/609/EC) and may be performed in order to diagnose animal diseases and improve animal welfare.

**Detection of Seropositivity for Small Ruminant Lentivirus, *C. abortus* or *M. avium* subsp. *paratuberculosis***

For the detection of seropositive animals for *Small Ruminant Lentivirus*, blood samples were collected and tested for *Small Ruminant Lentivirus* antibodies by using a commercially available ELISA kit (IDDEX). The initial findings were subsequently confirmed by the PCR technique, where EDTA-treated blood samples from seropositive sheep were tested. Proviral DNA was extracted from blood samples, using the Blood kit for RNA and DNA purification (Gentra Systems). Extractions were carried out according to the manufacturer’s instructions. The final yield of DNA products was stored at -20°C, until use. Primers for a nested PCR, specific for the *gag-pol* and the *pol* gene region [24], were used to amplify a 1.8 kb and a 1.2 kb sequence, respectively. PCR products were gel-purified (QIAquick Gel Extraction Kit; Qiagen Ltd) and sequence analysis was performed twice on the complete viral genome (MWG Biotech), by using the forward and reverse PCR primers. All samples were analysed twice and only high-quality sequences were used.

The CHECKIT™ Chlamydia Test Kit (IDDEX) was used for detection of *C. abortus* antibodies in blood samples. All procedures were carried out according to the manufacturer’s instructions. Measurements were performed in duplicate and matching serum pairs were analyzed on the same microtitre plate. Samples with values <30% were considered to originate from animals with no infection, samples with values between 30 and 40% were considered to be from animals with inconclusive infection status and samples with values >40% were considered to originate from infected animals.

*M. avium* subsp. *paratuberculosis* diagnosis was performed in blood serum samples by testing for antibodies to the organism with a commercial ELISA kit (IDEXX) using the manufacturer’s protocol. Additionally, faecal samples were collected and cultured, following a slight modification of the protocol described in [25]. Specifically, the cultures were incubated at 37°C for up to 30 weeks and examined every fortnight for bacterial growth. To confirm the identity of colonies isolated, DNA was extracted from

**Table 1.** SNPs and alleles identified in ovine *TLR9* and *MyD88* genes.

| SNP <sup>a</sup> | Alleles <sup>b</sup> |    |    |    |    |    |    |    | Amino-acid change | Charge change |                    |
|------------------|----------------------|----|----|----|----|----|----|----|-------------------|---------------|--------------------|
|                  | 05                   | 06 | 07 | 08 | 09 | 10 | 11 | 01 |                   |               | 02                 |
| C1323T           | C                    | C  | T  | C  | C  | C  | T  |    |                   | No change     | No change          |
| G1340A           | G                    | A  | G  | A  | G  | G  | G  |    |                   | R447Q         | Positive/polar     |
| G1384T           | G                    | T  | G  | T  | T  | G  | G  |    |                   | A462S         | Non-polar/polar    |
| G1557C           | G                    | G  | G  | C  | G  | C  | C  |    |                   | G520R         | Non-polar/positive |
| T1571C           | T                    | T  | C  | C  | T  | C  | C  |    |                   | No change     | No change          |
| T528C            |                      |    |    |    |    |    |    | T  | C                 | No change     | No change          |
| A570G            |                      |    |    |    |    |    |    | A  | G                 | No change     | No change          |

<sup>a</sup>Numbering corresponds to NM\_001011555.1 *TLR9* and to NM\_001166183.1 *MyD88* sequences, counting as position 1 the nucleotide A of the ATG codon.

<sup>b</sup>Alleles 05–11 correspond to *TLR9* and alleles 01–02 to *MyD88*.

doi:10.1371/journal.pone.0063901.t001

**Table 2.** Allele frequency of *TLR9* and *MyD88* genes in three sheep breeds.

| Breed     | Allele frequency (%) for <i>TLR9</i> |    |    |    |    |    |    | Allele frequency (%) for <i>MyD88</i> |    |
|-----------|--------------------------------------|----|----|----|----|----|----|---------------------------------------|----|
|           | 05                                   | 06 | 07 | 08 | 09 | 10 | 11 | 01                                    | 02 |
| Boutsko   | 22                                   | 8  | 2  | 2  | 0  | 49 | 18 | 20                                    | 80 |
| Friesarta | 0                                    | 19 | 0  | 0  | 0  | 69 | 13 | 4                                     | 96 |
| Comisana  | 40                                   | 0  | 10 | 2  | 3  | 45 | 0  | 21                                    | 79 |

doi:10.1371/journal.pone.0063901.t002

the colonies and screened for presence of the *M. avium* subsp. *paratuberculosis*-specific insertion sequence IS900 [26].

### Isolation of Sheep Genomic DNA and PCR Amplification

Total genomic DNA was extracted from blood samples in the presence of 20 mM EDTA and was preserved in  $-20^{\circ}\text{C}$ , according to [27]. PCR reactions (50  $\mu\text{L}$ ) contained 200–300 ng of genomic DNA,  $10\times$  Taq buffer, 2 mM  $\text{MgCl}_2$ , 0.2 mM of each dNTP, 25 pmoles of each primer and 1 U Taq polymerase (Invitrogen). The primers (Fig. S1) were designed based on the *TLR9* and *MyD88* full length cDNA sequences (Genbank ID: NM\_001011555.1, [28]) and NM\_001166183, respectively]. For *TLR9*, the PCR product (414 bp) corresponded to nucleotides 1344–1757 of NM\_001011555.1 sequence (Fig. S1). *MyD88* PCR product contained nucleotides 470–738 of NM\_001166183 sequence and, additionally, one intron of 170 bp (Fig. S1). PCR conditions included an initial denaturation at  $95^{\circ}\text{C}$  for 5 min, followed by 35 cycles of denaturation at  $95^{\circ}\text{C}$  for 30 sec, annealing at  $59^{\circ}\text{C}$  for 40 sec and extension at  $72^{\circ}\text{C}$  for 40 sec, with a final extension at  $72^{\circ}\text{C}$  for 10 min. SSCP analysis has been performed as previously described in [27]. Homozygous samples were directly sequenced bi-directionally by Macrogen Inc., while heterozygous samples were sequenced after cloning in pGEM-T Easy vector.

### Data Analysis

The nucleotide and amino acid sequences were analyzed using the Bioedit v. 7.0.4 software [29]. Expected ( $H_e$ ) and observed ( $H_o$ ) heterozygosity were estimated using the GENETIX software [30]. Frequency distributions of each allele and genotype in seropositive or seronegative animals for each of the three agents under study were compared pair-wise with the  $\chi^2$  test using SPSS, which was used for performing all necessary analyses. Significance was set as  $P<0.05$ .

**Table 3.** Expected ( $H_e$ ) and observed ( $H_o$ ) heterozygosity for *TLR9* gene, in relation to seropositivity for *Small Ruminant Lentivirus* (*SRLV*), *C. abortus* (*CA*) or *M. avium* subsp. *paratuberculosis* (*MAP*) in three sheep flocks from different breeds.

| Breed     | $H_e$ | $H_o$ | Seroprevalence |           |            |
|-----------|-------|-------|----------------|-----------|------------|
|           |       |       | <i>SRLV</i>    | <i>CA</i> | <i>MAP</i> |
| Boutsko   | 0.675 | 0.843 | 41%            | 6%        | 8%         |
| Friesarta | 0.479 | 0.259 | 70%            | 11%       | 19%        |
| Comisana  | 0.626 | 0.900 | 7%             | 10%       | 7%         |
| Total     |       |       | 39%            | 8%        | 10%        |

doi:10.1371/journal.pone.0063901.t003

## Results

### Variation in *TLR9* and *MyD88* Genes

For *TLR9*, the PCR product corresponded to part of LRR 14, the spacer region between LRR 14 and 15 and the entire LRR 15, 16, 17 and 18 [11]. It has been selected, because it included the *TLR9* cleavage site [23], wherein putative polymorphisms might be significant. In total, seven *TLR9* alleles were identified (Fig. S1), five of which (*TLR9*-05 to *TLR9*-09) were new (Genbank accession numbers: HQ717158, HQ717159, HQ717160, JN377802, JN377803). The remaining two alleles (*TLR9*-10 and *TLR9*-11) were identical to alleles previously identified in Romney-breed animals (EF656459.1, EF656458.1). The nucleotide substitutions resulted in two synonymous and three non-synonymous nucleotide substitutions, which changed the amino acid polarity (Table 1, Fig. S1). More specifically, two of the amino acid changes (R447Q, A462S) were found to be located in the spacer region of the *TLR9* protein and the third (G520R) in the first residue of the LRR17 (Table 1, Fig. S1).

For *MyD88*, the PCR product contained the coding region for the TIR domain, which is responsible for *MyD88* sorting and signaling. *MyD88* gene exhibited less polymorphism than *TLR9*; only two different alleles (*MyD88*\_01, *MyD88*\_02) (Fig. S1) were identified (Genbank accession numbers: HQ717161, HQ717162) in 74 animals. The two nucleotide substitutions, which were identified, were synonymous and were localized in exonic sequences (Table 1, Fig. S1).

### Allelic Frequencies

Calculation of allelic frequencies in the three breeds studied, showed that *TLR9*-10 allele was the most common, with a frequency range of 45%–68.5% (Table 2). However, frequencies of the remaining alleles showed significant differences between breeds; allele *TLR9*-05 had a frequency of 21.5% and 40% in Boutsko and Comisana breeds, respectively, and was absent from Friesarta-breed (Table 2). For *MyD88* gene, allele *MyD88*\_02 was the most frequently identified in all breeds.

### Seroprevalence of *SRLV*, *MAP* and *Chlamydomphila abortus*

Seroprevalence of *Small Ruminant Lentivirus*, *C. abortus* and *M. avium* subsp. *paratuberculosis* infection was 39%, 8% and 10%, respectively. However, seroprevalence of each of the above infective agents differed significantly between the three flocks. Details are in Table 3.

### Levels of Heterozygosity for *TLR9* Alleles

Observed heterozygosity was found to be higher than expected in Boutsko and Comisana flocks; the opposite was identified in Friesarta flock (Table 3).

**Table 4.** Association of *TLR9* genotypes with seroprevalence for *Small Ruminant Lentivirus (SRLV)*, *C. abortus (CA)* or *M. avium* subsp. *paratuberculosis (MAP)* in three sheep flocks from different breeds.

| Breed                          | Genotype                       | Number of animals according to seropositive status |               |             |             |              |              |
|--------------------------------|--------------------------------|----------------------------------------------------|---------------|-------------|-------------|--------------|--------------|
|                                |                                | <i>SRLV</i> +                                      | <i>SRLV</i> – | <i>CA</i> + | <i>CA</i> – | <i>MAP</i> + | <i>MAP</i> – |
| Boutsko                        | <i>TLR9_6</i>                  | 0                                                  | 3             | 0           | 3           | 0            | 3            |
|                                | <i>TLR9_7</i>                  | 0                                                  | 1             | 0           | 1           | 0            | 1            |
|                                | <i>TLR9_10</i>                 | 1                                                  | 3             | 1           | 3           | 1            | 3            |
|                                | <i>TLR9_5+</i> <i>TLR9_6</i>   | 0                                                  | 1             | 0           | 1           | 0            | 1            |
|                                | <i>TLR9_5+</i> <i>TLR9_10</i>  | 0                                                  | 21            | 0           | 21          | 0            | 21           |
|                                | <i>TLR9_6+</i> <i>TLR9_10</i>  | 0                                                  | 1             | 0           | 1           | 0            | 1            |
|                                | <i>TLR9_8+</i> <i>TLR9_10</i>  | 2                                                  | 0             | 0           | 2           | 0            | 2            |
|                                | <i>TLR9_10+</i> <i>TLR9_11</i> | 18                                                 | 0             | 2           | 16          | 3            | 15           |
| Friesarta                      | <i>TLR9_6</i>                  | 0                                                  | 5             | 0           | 5           | 0            | 5            |
|                                | <i>TLR9_10</i>                 | 12                                                 | 3             | 0           | 15          | 3            | 12           |
|                                | <i>TLR9_10+</i> <i>TLR9_11</i> | 7                                                  | 0             | 2           | 5           | 3            | 4            |
| Comisana                       | <i>TLR9_7</i>                  | 0                                                  | 3             | 2           | 1           | 0            | 3            |
|                                | <i>TLR9_5+</i> <i>TLR9_10</i>  | 0                                                  | 24            | 0           | 24          | 1            | 23           |
|                                | <i>TLR9_8+</i> <i>TLR9_10</i>  | 1                                                  | 0             | 0           | 1           | 0            | 1            |
|                                | <i>TLR9_9+</i> <i>TLR9_10</i>  | 1                                                  | 1             | 0           | 2           | 1            | 1            |
| Cumulative results             | <i>TLR9_6</i>                  | 0                                                  | 8             | 0           | 8           | 0            | 8            |
|                                | <i>TLR9_7</i>                  | 0                                                  | 4             | 2           | 2           | 0            | 4            |
|                                | <i>TLR9_10</i>                 | 13                                                 | 6             | 1           | 18          | 4            | 15           |
|                                | <i>TLR9_5+</i> <i>TLR9_6</i>   | 0                                                  | 1             | 0           | 1           | 0            | 1            |
|                                | <i>TLR9_5+</i> <i>TLR9_10</i>  | 0                                                  | 45            | 0           | 45          | 1            | 44           |
|                                | <i>TLR9_6+</i> <i>TLR9_10</i>  | 0                                                  | 1             | 0           | 1           | 0            | 1            |
|                                | <i>TLR9_8+</i> <i>TLR9_10</i>  | 3                                                  | 0             | 0           | 3           | 0            | 3            |
|                                | <i>TLR9_9+</i> <i>TLR9_10</i>  | 1                                                  | 0             | 0           | 1           | 0            | 1            |
| <i>TLR9_10+</i> <i>TLR9_11</i> | 25                             | 0                                                  | 4             | 21          | 6           | 19           |              |

+: seropositive animals,  
 -: seronegative animals.  
 doi:10.1371/journal.pone.0063901.t004

**Association of *TLR9* Genotypes with Seropositivity**

The number of seropositive and seronegative animals for *Small Ruminant Lentivirus*, *C. abortus* or *M. avium* subsp. *paratuberculosis* in the three flocks according to *TLR9* genotypes are shown in Table 4 and in detail in Table S1. All sheep homozygote for *TLR9\_6* allele

or heterozygote for *TLR9\_6/TLR9\_5* or *TLR9\_6/TLR9\_10* were found to be seronegative. Additionally, 96% of animals with the *TLR9\_5* allele together with the *TLR9\_10* or the *TLR9\_6* allele were also found seronegative. The *TLR9\_5* allele has not been found in homozygosity. On the other hand, the homozy-

**Table 5.** Genotype frequency of the G520R substitution in sheeps seropositive or seronegative for *Small Ruminant Lentivirus (SRLV)*, *C. abortus (CA)* or *M. avium* subsp. *paratuberculosis (MAP)*.

| Seropositive status | Genotype for G520 R    |           |           |           | Allele frequency |             |          | Genotype frequency     |           |          |           |           |           |          |
|---------------------|------------------------|-----------|-----------|-----------|------------------|-------------|----------|------------------------|-----------|----------|-----------|-----------|-----------|----------|
|                     | <i>GG</i> or <i>GR</i> | <i>RR</i> | <i>GG</i> | <i>GR</i> | <i>P(R)</i>      | <i>P(G)</i> | <i>P</i> | <i>GG</i> or <i>GR</i> | <i>RR</i> | <i>P</i> | <i>RR</i> | <i>GG</i> | <i>GR</i> | <i>P</i> |
| <i>SRLV</i> +       | 0.024                  | 0.976     | 0         | 0.024     | 0.988            | 0.001       | 0.024    | 0.976                  |           |          | 0.976     | 0         | 0.024     |          |
| <i>SRLV</i> –       | 0.909                  | 0.091     | 0.197     | 0.712     | 0.447            | 0.553       | <0.001   | 0.909                  | 0.091     | 0.004    | 0.091     | 0.197     | 0.712     | 0.009    |
| <i>CA</i> +         | 0.182                  | 0.818     | 0.182     | 0         | 0.82             | 0.18        | 0.182    | 0.818                  |           |          | 0.818     | 0.182     | 0         |          |
| <i>CA</i> –         | 0.608                  | 0.392     | 0.113     | 0.495     | 0.64             | 0.36        | 0.114    | 0.608                  | 0.392     | 0.433    | 0.392     | 0.113     | 0.495     | 0.607    |
| <i>MAP</i> +        | 0.333                  | 0.667     | 0         | 0.333     | 0.83             | 0.17        | 0.333    | 0.667                  |           |          | 0.667     | 0.667     | 0.333     |          |
| <i>MAP</i> –        | 0.586                  | 0.414     | 0.131     | 0.455     | 0.64             | 0.36        | 0.095    | 0.586                  | 0.414     | 0.625    | 0.414     | 0.414     | 0.455     | 0.853    |

+: seropositive animals,  
 -: seronegative animals.  
 doi:10.1371/journal.pone.0063901.t005

osity of *TLR9\_10* allele does not seem to be associated with seronegativity, as only three out of nineteen individuals are seronegative.

Comparison of the non-synonymous substitutions between the various alleles (Table 1) showed that the G520R substitution was the one differentiating them; at amino-acid level, the allele *TLR9\_5* was identical to *TLR9\_7* and *TLR9\_10* was identical to *TLR9\_11*. In addition, both alleles *TLR9\_5* and *TLR9\_10* carry arginine (R) and alanine at positions 447 and 462, respectively. The allele and genotype frequencies of the G520R in seropositive and seronegative animals are shown in Table 5. Frequency of *R* variation was significantly increased in sheep seropositive for *Small Ruminant Lentivirus* ( $P < 0.001$ ). Frequency of *RR* genotypes was also significantly increased in seropositive sheep, as identified based on recessive ( $P = 0.004$ ) or genotypic ( $P = 0.009$ ) model. Finally, no associations were identified for allele or genotype frequencies between *C. abortus*- or *M. avium* subsp. *paratuberculosis*-seropositive or seronegative animals.

## Discussion

Until today, *TLR9* polymorphisms have been described only in two breeds, the Tsigai-breed, which is distributed in Eastern and Central Europe, and in Romney-breed, which is widely farmed in New Zealand [31,32]. In the present study, seven different alleles were identified for *TLR9*, six of which were found to be present in the flock from Boutsko-breed, three in the flock from Friesarta-breed and five in the flock from Comisana-breed. Observed differences in the level of polymorphism and the absence of specific alleles from a breed may be the consequence of evolution forces, although sampling bias may also contribute as the sample selection does not allow for a good representation of the sheep population.

To the best of our knowledge, this is the first report regarding level of polymorphism of *MyD88* gene in sheep (*Ovis aries*). The gene exhibits substantially lower polymorphism; only two alleles, with no difference at the level of amino-acid sequence, were detected among the animals studied. This may be the consequence of the TIR domain containing three highly conserved motifs, which are essential for proper expression and signaling [33]. Nevertheless, during this study, one intron of 170 bp that follows the *GT-AG* rule was identified, according to the genomic organization of this gene in other mammals (e.g. Gene ID 444881 in *Bos taurus* and 17874 in *Mus musculus*).

A significant difference was found in seroprevalence among flocks; Friesarta-breed animals have a higher seroprevalence, especially for *Small Ruminant Lentivirus*, the seroprevalence of which has been found to be 70%, whilst in Boutsko- and Comisana-breeds it was 41% and 7%, respectively. Under the heterozygote advantage hypothesis, this could be attributed to the low levels of *TLR9* observed heterozygosity in the flock from Friesarta-breed, where observed heterozygosity was significantly lower to the expected. This might be the effect of population bottlenecks,

## References

1. Fthenakis GC, Menzies PI (2001) Preface. Therapeutics and control of sheep and goat diseases. *Vet Clin N Am-Food A* 27, xxiii–xiv.
2. Peterhans E, Greenland T, Badiola J, Harkiss G, Bertoni G, et al. (2004) Routes of transmission and consequences of small ruminant lentiviruses (SRLVs) infection and eradication schemes. *Vet Res* 35: 257–274.
3. Aitken ID (1993) Ovine chlamydial abortion. In: Woldehiwet, Z., Ristic, M. (Eds.), *Rickettsial and Chlamydial Diseases of Domestic Animals*. Pergamon Press, Oxford, 349–360.
4. Juste RA, Perez V (2011) Control of paratuberculosis in sheep and goats. *Vet Clin N Am-Food A* 27: 127–138.

inbreeding or meta-population dynamics, which have reduced the level of genetic variation. Alternatively, the high seroprevalence might be the consequence of the presence of the G520R R allele in this breed (only 19% of the animals carried the G allele). The results also indicate that the *TLR9\_5* and *TLR9\_6* alleles are associated with seronegativity. Finally, we cannot exclude that the findings are a product of chance due to the sampling bias. It is noteworthy that animals of Friesarta-breed have been reported to have an increased susceptibility to bacterial respiratory infections [34]. This could be the result of subclinical *Small Ruminant Lentivirus* infections, which have a predisposing role to bacterial infections of the lungs. Moreover, Friesarta-breed sheep have been previously reported to have increased susceptibility to bacterial mastitis [35].

Moreover, our results indicated that the change of G to R at codon 520 could be associated with seropositivity for *Small Ruminant Lentivirus*. Potential associations between various polymorphisms of *TLR9* and *Small Ruminant Lentivirus* susceptibility have been previously studied [32], but the results obtained were not conclusive enough regarding such an association. This amino-acid substitution, which can result in polarity change, might influence structure and function of LRR17, interfering with ligand binding, and could be used in studies examining susceptibility/resistance to *Small Ruminant Lentivirus* infections in sheep. Further work is needed in which more flocks from different breeds will be analyzed, in order to have a better representation of the sheep population. In addition, functional studies are required in order to identify whether this variant itself affects *TLR9* function or it is an indirect marker of association due to linkage disequilibrium.

## Supporting Information

**Figure S1 *TLR9* and *MyD88* polymorphisms in *Ovis aries*.** DNA and protein sequence alignment for the seven *TLR9* and the two *MyD88* alleles that were identified in this study (Genbank accession numbers: HQ717158, HQ717159, HQ717160, JN377802, JN377803 and HQ717161, HQ717162, respectively). Dots indicate bases that are identical at the position to top sequence. Primer sequences are shown underlined. The limits of the different LRRs (part of LRR14, LRR15-LRR17 and part of LRR18) were defined according to human orthologous protein (Bell *et al.* 2003) and are shown by arrows. The intervening region between LRR14 and 15 is shaded in gray. (DOC)

**Table S1 Genotypes in *TLR9* gene in sheep breeds.** (XLSX)

## Author Contributions

Conceived and designed the experiments: TS GCF CB ZM. Performed the experiments: GK CS VS. Analyzed the data: TS GK CS VS GCF CB ZM. Contributed reagents/materials/analysis tools: VS GCF CB ZM. Wrote the paper: TS GCF CB ZM. Revised the article: GK CS VS. Final approval of the article: TS GK CS VS GCF CB ZM.

5. Pine S, McElrath MJ, Bochud PY (2009) Polymorphisms in toll-like receptor 4 and toll-like receptor 9 influence viral load in a seroincident cohort of HIV-1-infected individuals. *AIDS* 23: 2387–2395.
6. Bochud PY, Hawn TR, Aderem A (2003) Cutting edge: a Toll-like receptor 2 polymorphism that is associated with lepromatous leprosy is unable to mediate mycobacterial signaling. *J Immunol* 170: 3451–4.
7. Fisher CA, Bhattarai EK, Osterstock JB, Dowd SE, Seabury PM, et al. (2011) Evolution of the Bovine *TLR* Gene Family and Member Associations with *Mycobacterium avium* Subspecies *paratuberculosis* Infection. *PLoS ONE* 6: e27744.

8. Ruiz-Larrañaga O, Manzano C, Iriondo M, Garrido JM, Molina E, et al. (2011) Genetic variation of toll-like receptor genes and infection by *Mycobacterium avium* ssp. *paratuberculosis* in Holstein-Friesian cattle. *J Dairy Sci* 94: 3635–41.
9. Shinkai H, Suzuki R, Akiba M, Okumura N, Uenishi H (2011) Porcine Toll-like receptors: Recognition of *Salmonella enterica* serovar *Choleraesuis* and influence of polymorphisms. *Mol Immunol* 48: 1114–1120.
10. Oliveira SC, Macedo GC, de Almeida LA, de Oliveira FS, Oñate A, et al. (2010) Recent Advances in Understanding Immunity Against Brucellosis: Application for Vaccine Development. *Open Vet Sci J* 4: 102–108.
11. Bell JK, Mullen GED, Leifer CA, Mazzoni A, Ravies DR, et al. (2003) Leucine-rich repeats and pathogen recognition in Toll-like receptors. *Trends Immunol* 24: 528–533.
12. Bhide MR, Mucha R, Mikula Jr I, Kisova L, Skrabana R, et al. (2009) Novel mutations in TLR genes cause hyporesponsiveness to *Mycobacterium avium* subsp. *paratuberculosis* infection. *BMC Genet* 10: 21.
13. Mucha R, Bhide MR, Chakurkar EB, Novak M, Mikula Sr I (2009) Toll-like receptors TLR1, TLR2 and TLR4 gene mutations and natural resistance to *Mycobacterium avium* subsp. *paratuberculosis* infection in cattle. *Vet Immunol Immunopathol* 128: 381–388.
14. Koets A, Santema W, Mertens H, Oostenrijk D, Kcestra M, et al. (2010) Susceptibility to paratuberculosis infection in cattle is associated with single nucleotide polymorphisms in toll-like receptor 2 which modulate immune responses against *Mycobacterium avium* subspecies *paratuberculosis*. *Prev Vet Med* 93: 305–315.
15. Feng CG, Scanga CA, Collazo-Custodio CM, Cheever AW, Hieny S, et al. (2003). Mice lacking myeloid differentiation factor 88 display profound defects in host resistance and immune responses to *Mycobacterium avium* infection not exhibited by Toll-like receptor 2 (TLR2)- and TLR4-deficient animals. *J Immunol* 171: 4758–4764.
16. Fremont CM, Yeremeev V, Nicolle DM, Jacobs M, Quesniaux VF, et al. (2004) Fatal *Mycobacterium tuberculosis* infection despite adaptive immune response in the absence of MyD88. *J Clin Invest* 114: 1790–1799.
17. Scanga CA, Bafica A, Feng CG, Cheever AW, Hieny S, et al. (2004) MyD88-deficient mice display a profound loss in resistance to *Mycobacterium tuberculosis* associated with partially impaired Th1 cytokine and nitric oxide synthase 2 expression. *Infect Immun* 72: 2400–2404.
18. Nalubamba K, Smeed J, Gossner A, Watkins C, Dalziel R, et al. (2008) Differential expression of pattern recognition receptors in the three pathological forms of sheep paratuberculosis. *Microbes Infect* 10: 598e604.
19. Taylor DL, Zhong L, Begg DJ, de Silva K, Whittington RJ (2008) Toll-like receptor genes are differentially expressed at the sites of infection during the progression of Johne's disease in outbred sheep. *Vet Immunol Immunop* 124: 132–151.
20. Zhong L, Di Fiore L, Taylor D, Begg D, de Silva K, et al. (2009) Identification of differentially expressed genes in ileum, intestinal lymph node and peripheral blood mononuclear cells of sheep infected with *Mycobacterium avium* subsp. *paratuberculosis* using differential display polymerase chain reaction. *Vet Immunol Immunop* 131: 177–189.
21. Subharata S, Shua D, de Lisle GW, Buddlea BM, Wedlock DN (2012) Altered patterns of toll-like receptor gene expression in cull cows infected with *Mycobacterium avium* subsp. *paratuberculosis*. *Vet Immunol Immunop* 145: 471–478.
22. Ewald SE, Lee BL, Lau L, Wickliffe KE, Shi GP, et al. (2008) The ectodomain of Toll-like receptor 9 is cleaved to generate a functional receptor. *Nature* 456: 658–62.
23. Park B, Brinkmann MM, Spooner E, Lee CC, Kim YM, et al. (2008) Proteolytic cleavage in an endolysosomal compartment is required for activation of Toll-like receptor 9. *Nat Immunol* 9: 1407–14.
24. Shah C, Boni J, Huder JB, Vogt HR, Muhlherr J, et al. (2004) Phylogenetic analysis and reclassification of caprine and ovine lentiviruses based on 104 new isolates: evidence for regular sheep-to-goat transmission and worldwide propagation through livestock trade. *Virology* 319: 12–26.
25. Kostoulas P, Leontides L, Billinis C, Florou M (2006) Application of a semi-dependent latent model in the Bayesian estimation of the sensitivity and specificity of two faecal culture methods for diagnosis of paratuberculosis in subclinically infected greek dairy sheep and goats. *Prev Vet Med* 76: 121–134.
26. Green EP, Tizzard MLV, Moss MT, Thompson J, Winterbourne DJ, et al. (1989) Sequence and characteristics of IS900, an insertion element identified in a human Crohn's disease isolate of *Mycobacterium avium* subsp. *paratuberculosis*. *Nucleic Acids Res* 17: 9063–9073.
27. Koutsogiannouli EA, Moutou KA, Sarafidou T, Stamatis C, Spyrou V, et al. (2009) Major histocompatibility complex variation at class II DQA locus in the brown hare (*Lepus europaeus*) (2009). *Mol Ecol* 18: 4631–4649.
28. Chang JS, Russell GC, Jann O, Glass EJ, Werling D, et al. (2009) Molecular cloning and characterization of Toll-like receptors 1–10 in sheep. *Vet Immunol Immunop* 127: 94–105.
29. Hall TA (1999) BioEdit: A user-friendly biological sequence alignment editor and analysis program for Windows 95/98/NT. *Nucleic Acids Symp Ser* 41: 95–98.
30. Belkhir K (1999) Genetix, logiciel sous Windows pour la génétique des populations, Laboratoire Génome et Populations, CNRS UPR 9060. Université de Montpellier II, Montpellier (France).
31. Zhou H, Hickford JG (2008) Polymorphism of Toll-like receptor 9 (TLR9) gene in sheep. *Vet Immunol Immunop* 121: 140–3.
32. Mikula I Jr, Mikula I Sr (2011) Characterization of ovine Toll-like receptor 9 protein coding region, comparative analysis, detection of mutations and maedi visna infection. *Dev Comp Immunol* 35: 182–92.
33. Slack JL, Schooley K, Bonnert TP, Mitcham JL, Qwarnstrom EE (2000) Identification of two major sites in the type I interleukin-1 receptor cytoplasmic region responsible for coupling to pro-inflammatory signaling pathways. *J Biol Chem* 275: 4670–8.
34. Christodouloupoulos G, Fthenakis GC (2005) Respiratory infections in young lambs in Greece: status and field experience with their control. Proceedings of the 6th International Sheep Veterinary Congress (Hersonissos, Greece), 161–163.
35. Fragkou IA, Skoufos J, Cripps PJ, Kyriazakis I, Papaioannou N, et al. (2007) Differences in susceptibility to *Mannheimia haemolytica*-associated mastitis between two breeds of dairy sheep. *J Dairy Sci* 74: 349–355.
